# Supplementary material
Source: MDPI journal article supplement (https://www.mdpi.com/2227-9717/11/7/1899)
Supplement: s1 [file s1]

# Supplementary Material:

A new ODE based Julia implementation of the Anaerobic Digestion Model No. 1  
greatly outperforms existing DAE based Java and Python implementations

Courtney Allen \*  
callen15@uoguelph.ca

Alexandra Mazanko  
amazanko@uoguelph.ca

Niloofar Abdehagh  
nabdehagh@chfourbiogas.com

Hermann Eberl  
heberl@uoguelph.ca

May 2023

## Contents

|          |                                                                          |          |
|----------|--------------------------------------------------------------------------|----------|
| <b>1</b> | <b>Julia Code and Data</b>                                               | <b>2</b> |
| <b>2</b> | <b>Analysis of high weighted averages and low methane concentrations</b> | <b>2</b> |
| <b>3</b> | <b>Paramter Names</b>                                                    | <b>3</b> |

---

\*Corresponding Author

# 1 Julia Code and Data

The Julia code and all associated data can be found in a GitHub repository at:  
<https://github.com/CourtA96/ADM1j1>

## 2 Analysis of high weighted averages and low methane concentrations

High weighted averages do not occur for the same parameter values as low methane concentrations, that is, if the weighted average is high, the methane concentration is not near zero, and vice versa. This indicates that the two phenomena are not likely related. To determine which parameter values might be causing these phenomena, a t-test was used to compare the means of the parameter values corresponding to the outlier cases, with those corresponding to the typical cases. Table 1 lists the parameters where the t-test returned a significant difference between the mean values.

Table 1: Parameter values where the mean value corresponding to the outlier cases is significantly different to that of the typical cases. The names of the parameters are given in Section 3.

|                                                        | Parameter  | Typical Mean | Outlier Mean | T-test P value          |
|--------------------------------------------------------|------------|--------------|--------------|-------------------------|
| Small $CO_2$                                           | C_ch       | 0.031        | 0.028        | $7.32 \cdot 10^{-4}$    |
|                                                        | C_pr       | 0.030        | 0.026        | $1.38 \cdot 10^{-6}$    |
|                                                        | f_ac_aa    | 0.40         | 0.43         | $2.45 \cdot 10^{-3}$    |
|                                                        | k_dec_X_aa | 0.020        | 0.021        | 0.04                    |
|                                                        | pH_UL_h2   | 5.99         | 5.67         | 0.04                    |
|                                                        | V_gas      | 297.71       | 321.46       | $3.39 \cdot 10^{-3}$    |
| Small $CO_2$<br>(constant<br>pressure)                 | C_ch       | 0.031        | 0.028        | 0.01                    |
|                                                        | C_pr       | 0.030        | 0.026        | $2.46 \cdot 10^{-5}$    |
|                                                        | f_ac_aa    | 0.40         | 0.43         | $7.09 \cdot 10^{-3}$    |
|                                                        | k_dec_X_aa | 0.020        | 0.021        | 0.04                    |
|                                                        | pH_LL_aa   | 4.43         | 4.07         | 0.04                    |
|                                                        | pH_LL_h2   | 5.25         | 4.83         | 0.03                    |
|                                                        | pH_UL_h2   | 6.00         | 5.57         | 0.02                    |
|                                                        | V_gas      | 297.99       | 320.96       | 0.01                    |
| Large<br>Weighted<br>Average                           | f_bu_aa    | 0.26         | 0.25         | 0.02                    |
|                                                        | k_m_pro    | 13.07        | 12.47        | 0.02                    |
|                                                        | N_aa       | 0.0071       | 0.0066       | $2.63 \cdot 10^{-3}$    |
|                                                        | pH_LL_ac   | 6.22         | 7.23         | $6.54 \cdot 10^{-10}$   |
|                                                        | pH_LL_h2   | 5.19         | 5.57         | $1.79 \cdot 10^{-3}$    |
|                                                        | pH_UL_ac   | 6.69         | 7.91         | $4.68 \cdot 10^{-10}$   |
|                                                        | pH_UL_h2   | 5.97         | 6.27         | $7.36 \cdot 10^{-3}$    |
|                                                        | Y_ac       | 0.05         | 0.047        | 0.04                    |
| Large<br>Weighted<br>Average<br>(constant<br>pressure) | f_bu_aa    | 0.26         | 0.25         | 0.01                    |
|                                                        | k_m_c4     | 20.29        | 18.87        | 0.02                    |
|                                                        | N_aa       | 0.0071       | 0.0067       | 0.02                    |
|                                                        | pH_LL_ac   | 6.22         | 7.14         | $2.10 \cdot 10^{-10}$   |
|                                                        | pH_LL_h2   | 5.19         | 5.57         | $9.53.79 \cdot 10^{-4}$ |
|                                                        | pH_UL_ac   | 6.95         | 7.89         | $8.5 \cdot 10^{-11}$    |
|                                                        | pH_UL_h2   | 5.96         | 6.18         | $6.43 \cdot 10^{-3}$    |
|                                                        | Y_ac       | 0.05         | 0.047        | 0.03                    |

### 3 Paramter Names

Table 2: Table of parameter names and the amount they were varied.

| Parameter | Name                                                                    | Varied by    |
|-----------|-------------------------------------------------------------------------|--------------|
| R         | Gas law constant                                                        | Constant     |
| T_base    | Base reactor temperature                                                | Constant     |
| P_atm     | Atmospheric pressure                                                    | $\pm 5\%$    |
| T_op      | Reactor Operating Temperature                                           | $\pm 0.15\%$ |
| f_sI_xc   | Yield (catabolism only) of soluble inerts on composite material         | $\pm 15\%$   |
| f_xI_xc   | Yield (catabolism only) of particulate inerts on composite material     | $\pm 15\%$   |
| f_ch_xc   | Yield (catabolism only) of carbohydrates on composite material          | $\pm 15\%$   |
| f_pr_xc   | Yield (catabolism only) of proteins on composite material               | $\pm 15\%$   |
| f_li_xc   | Yield (catabolism only) of lipids on composite material                 | $\pm 15\%$   |
| N_xc      | Nitrogen content of composite material                                  | $\pm 15\%$   |
| N_I       | Nitrogen content of inerts                                              | $\pm 15\%$   |
| N_aa      | Nitrogen content of amino acids                                         | $\pm 15\%$   |
| C_xc      | Carbon content of composite material                                    | $\pm 15\%$   |
| C_sI      | Carbon content of soluble inerts                                        | $\pm 15\%$   |
| C_ch      | Carbon content of carbohydrates                                         | $\pm 15\%$   |
| C_pr      | Carbon content of proteins                                              | $\pm 15\%$   |
| C_li      | Carbon content of lipids                                                | $\pm 15\%$   |
| C_xI      | Carbon content of particulate inerts                                    | $\pm 15\%$   |
| C_su      | Carbon content of monosaccharides                                       | $\pm 15\%$   |
| C_aa      | Carbon content of amino acids                                           | $\pm 15\%$   |
| f_fa_li   | Yield (catabolism only) of long chain fatty acids on composite material | Constant     |
| C_fa      | Carbon content of long chain fatty acids                                | Constant     |
| f_h2_su   | Yield (catabolism only) of hydrogen on monosaccharides                  | $\pm 15\%$   |
| f_bu_su   | Yield (catabolism only) of butyrate on monosaccharides                  | $\pm 15\%$   |
| f_pro_su  | Yield (catabolism only) of propionate on monosaccharides                | $\pm 15\%$   |
| f_ac_su   | Yield (catabolism only) of acetate on monosaccharides                   | $\pm 15\%$   |
| N_bac     | Nitrogen content of bacteria                                            | Constant     |
| C_bu      | Carbon content of butyrate                                              | Constant     |
| C_pro     | Carbon content of propionate                                            | Constant     |
| C_ac      | Carbon content of acetate                                               | Constant     |
| C_bac     | Carbon content of bacteria                                              | Constant     |
| Y_su      | Yield of biomass on monosaccharides                                     | $\pm 15\%$   |
| f_h2_aa   | Yield (catabolism only) of hydrogen on amino acids                      | $\pm 15\%$   |
| f_va_aa   | Yield (catabolism only) of valerate on amino acids                      | $\pm 15\%$   |
| f_bu_aa   | Yield (catabolism only) of butyrate on amino acids                      | $\pm 15\%$   |
| f_pro_aa  | Yield (catabolism only) of propionate on amino acids                    | $\pm 15\%$   |
| f_ac_aa   | Yield (catabolism only) of acetate on amino acids                       | $\pm 15\%$   |
| C_va      | Carbon content of valerate                                              | Constant     |
| Y_aa      | Yield of biomass on amino acids                                         | $\pm 15\%$   |
| Y_fa      | Yield of biomass long chain fatty acids                                 | $\pm 15\%$   |
| Y_c4      | Yield of biomass methane                                                | $\pm 15\%$   |
| Y_pro     | Yield of biomass propionate                                             | $\pm 15\%$   |
| C_ch4     | Carbon content of methane                                               | Constant     |
| Y_ac      | Yield of biomass on acetate                                             | $\pm 15\%$   |
| Y_h2      | Yield of biomass on hydrogen                                            | $\pm 15\%$   |
| k_dis     | First prder parameter for disintegration                                | $\pm 15\%$   |
| k_hyd_ch  | First order parameter for hydrolysis on carbohydrates                   | $\pm 15\%$   |
| k_hyd_pr  | First order parameter for hydrolysis on proteins                        | $\pm 15\%$   |
| k_hyd_li  | First order parameter for hydrolysis on lipids                          | $\pm 15\%$   |
| K_S.IN    | Half saturation value of inorganic carbon                               | $\pm 15\%$   |
| k_m_su    | Monod maximum specific uptake rate of monosaccharides                   | $\pm 15\%$   |

Table 3: Table of parameter names and the amount they were varied (continued). The lower limits of pH inhibition were calculated by subtracting a random number in the given interval from the upper limit.

| Parameter                                    | Name                                                               | Varied by                                        |
|----------------------------------------------|--------------------------------------------------------------------|--------------------------------------------------|
| K <sub>S</sub> <sub>su</sub>                 | Half saturation value of monosaccharides                           | ±15%                                             |
| pH <sub>UL</sub> <sub>aa</sub>               | Upper limit where 50% of amino acid particulate is inhibited       | ±15%                                             |
| pH <sub>LL</sub> <sub>aa</sub>               | Lower limit where 50% of amino acid particulate is inhibited       | pH <sub>UL</sub> <sub>aa</sub> −rand(0.75, 1.5)  |
| k <sub>m</sub> <sub>aa</sub>                 | Monod maximum specific uptake rate of amino acid                   | ±15%                                             |
| K <sub>S</sub> <sub>aa</sub>                 | Half saturation value of amino acid                                | ±15%                                             |
| k <sub>m</sub> <sub>fa</sub>                 | Monod maximum specific uptake rate of long chain fatty acids       | ±15%                                             |
| K <sub>S</sub> <sub>fa</sub>                 | Half saturation value of long chain fatty acids                    | ±15%                                             |
| K <sub>I</sub> <sub>h2</sub> <sub>fa</sub>   | 50% inhibitory concentration of hydrogen on long chain fatty acids | ±15%                                             |
| k <sub>m</sub> <sub>c4</sub>                 | Monod maximum specific uptake rate of methane                      | ±15%                                             |
| K <sub>S</sub> <sub>c4</sub>                 | Half saturation value of methane                                   | ±15%                                             |
| K <sub>I</sub> <sub>h2</sub> <sub>c4</sub>   | 50% inhibitory concentration of hydrogen on methane                | ±15%                                             |
| k <sub>m</sub> <sub>pro</sub>                | Monod maximum specific uptake rate of propionate                   | ±15%                                             |
| K <sub>S</sub> <sub>pro</sub>                | Half saturation value of propionate                                | ±15%                                             |
| K <sub>I</sub> <sub>h2</sub> <sub>pro</sub>  | 50% inhibitory concentration of hydrogen on propionate             | ±15%                                             |
| k <sub>m</sub> <sub>ac</sub>                 | Monod maximum specific uptake rate of acetate                      | ±15%                                             |
| K <sub>S</sub> <sub>ac</sub>                 | Half saturation value of acetate                                   | ±15%                                             |
| K <sub>I</sub> <sub>nh3</sub>                | 50% inhibitory concentration of ammonia                            | ±15%                                             |
| pH <sub>UL</sub> <sub>ac</sub>               | Upper limit where 50% of acetate particulate is inhibited          | ±15%                                             |
| pH <sub>LL</sub> <sub>ac</sub>               | Lower limit where 50% of acetate particulate is inhibited          | pH <sub>UL</sub> <sub>ac</sub> −rand(0.5, 1)     |
| k <sub>m</sub> <sub>h2</sub>                 | Monod maximum specific uptake rate of hydrogen                     | ±15%                                             |
| K <sub>S</sub> <sub>h2</sub>                 | Half saturation value of hydrogen                                  | ±15%                                             |
| pH <sub>UL</sub> <sub>h2</sub>               | Upper limit where 50% of hydrogen particulate is inhibited         | ±15%                                             |
| pH <sub>LL</sub> <sub>h2</sub>               | Lower limit where 50% of hydrogen particulate is inhibited         | pH <sub>UL</sub> <sub>h2</sub> −rand(0.5, 1)     |
| k <sub>dec</sub> <sub>X</sub> <sub>su</sub>  | First order decay rate for monosaccharide particulates             | ±15%                                             |
| k <sub>dec</sub> <sub>X</sub> <sub>aa</sub>  | First order decay rate for amino acid particulates                 | ±15%                                             |
| k <sub>dec</sub> <sub>X</sub> <sub>fa</sub>  | First order decay rate for long chain fatty acid particulates      | ±15%                                             |
| k <sub>dec</sub> <sub>X</sub> <sub>c4</sub>  | First order decay rate for methane particulates                    | ±15%                                             |
| k <sub>dec</sub> <sub>X</sub> <sub>pro</sub> | First order decay rate for propionate particulates                 | ±15%                                             |
| k <sub>dec</sub> <sub>X</sub> <sub>ac</sub>  | First order decay rate for acetate particulates                    | ±15%                                             |
| k <sub>dec</sub> <sub>X</sub> <sub>h2</sub>  | First order decay rate for hydrogen particulates                   | ±15%                                             |
| T <sub>ad</sub>                              | Temperature of anaerobic digester                                  | Equal to T <sub>op</sub>                         |
| K <sub>h2o</sub>                             | Acid/base equilibrium coefficient for water                        | calc. from T <sub>base</sub> and T <sub>ad</sub> |
| K <sub>a</sub> <sub>va</sub>                 | Acid/base equilibrium coefficient for valerate                     | Constant                                         |
| K <sub>a</sub> <sub>bu</sub>                 | Acid/base equilibrium coefficient for butyrate                     | Constant                                         |
| K <sub>a</sub> <sub>pro</sub>                | Acid/base equilibrium coefficient for propionate                   | Constant                                         |
| K <sub>a</sub> <sub>ac</sub>                 | Acid/base equilibrium coefficient for acetate                      | Constant                                         |
| K <sub>a</sub> <sub>co2</sub>                | Acid/base equilibrium coefficient for carbon dioxide               | calc. from T <sub>base</sub> and T <sub>ad</sub> |
| K <sub>a</sub> <sub>IN</sub>                 | Acid/base equilibrium coefficient for inorganic nitrogen           | calc. from T <sub>base</sub> and T <sub>ad</sub> |
| k <sub>AB</sub> <sub>va</sub>                | Acid/base kinetic parameter for valerate                           | rand(0%, 25%)                                    |
| k <sub>AB</sub> <sub>bu</sub>                | Acid/base kinetic parameter for butyrate                           | rand(0%, 25%)                                    |
| k <sub>AB</sub> <sub>pro</sub>               | Acid/base kinetic parameter for propionate                         | rand(0%, 25%)                                    |
| k <sub>AB</sub> <sub>ac</sub>                | Acid/base kinetic parameter for acetate                            | rand(0%, 25%)                                    |
| k <sub>AB</sub> <sub>co2</sub>               | Acid/base kinetic parameter for carbon dioxide                     | rand(0%, 25%)                                    |
| k <sub>AB</sub> <sub>IN</sub>                | Acid/base kinetic parameter for inorganic nitrogen                 | rand(0%, 25%)                                    |
| p <sub>gas</sub> <sub>h2o</sub>              | Steady-state gas phase partial pressure of water                   | calc. from T <sub>base</sub> and T <sub>ad</sub> |
| k <sub>p</sub>                               | Gas outlet friction                                                | Constant                                         |
| k <sub>L</sub> <sub>a</sub>                  | Gas-liquid transfer coefficient                                    | Constant                                         |
| K <sub>H</sub> <sub>co2</sub>                | Henry's law coefficient for carbon dioxide                         | calc. from T <sub>base</sub> and T <sub>ad</sub> |
| K <sub>H</sub> <sub>ch4</sub>                | Henry's law coefficient for methane                                | calc. from T <sub>base</sub> and T <sub>ad</sub> |
| K <sub>H</sub> <sub>h2</sub>                 | Henry's law coefficient for hydrogen                               | calc. from T <sub>base</sub> and T <sub>ad</sub> |
| V <sub>liq</sub>                             | Volume of liquid in reactor                                        | ±15%                                             |
| V <sub>gas</sub>                             | Volume of gas in reactor                                           | ±15%                                             |
| Q <sub>ad</sub>                              | Flow rate                                                          | ±15%                                             |
